# Supplementary material for: Viscosity scaling of the self-diffusion and velocity cross-correlation coefficients of two functionalised ionic liquids and of their non-functionalized analogues
Source: Royal Society of Chemistry journal article supplement (doi:10.1039/c4cp00435c), 2014-01-01
Supplement: c4cp00435c1.pdf [file c4cp00435c1.pdf]

**Supplementary Information for**

Kenneth R Harris, Takashi Makino and Mitsuhiro Kanakubo

*Viscosity Scaling of the Self-diffusion and Velocity Cross-correlation*

*Coefficients of Two Functionalised Ionic Liquids and of their Non-functionalized Analogues.*

*Phys. Chem. Chem. Phys.* 2014, **xx**, 0000-0000.

**Table S1. Self-diffusion coefficients.**

| [N <sub>1125</sub> ][Tf <sub>2</sub> N] |                                                                            |              |                                                                            | [N <sub>112,20CO1</sub> ][Tf <sub>2</sub> N] |                                                                            |              |                                                                            |
|-----------------------------------------|----------------------------------------------------------------------------|--------------|----------------------------------------------------------------------------|----------------------------------------------|----------------------------------------------------------------------------|--------------|----------------------------------------------------------------------------|
| <i>T</i> /°C                            | 10 <sup>12</sup><br><i>D</i> <sub>+</sub> /m <sup>2</sup> ·s <sup>-1</sup> | <i>T</i> /°C | 10 <sup>12</sup> <i>D</i> <sub>-</sub><br>/m <sup>2</sup> ·s <sup>-1</sup> | <i>T</i> /°C                                 | 10 <sup>12</sup><br><i>D</i> <sub>+</sub> /m <sup>2</sup> ·s <sup>-1</sup> | <i>T</i> /°C | 10 <sup>12</sup> <i>D</i> <sub>-</sub><br>/m <sup>2</sup> ·s <sup>-1</sup> |
| 29.97                                   | 12.10                                                                      | 39.98        | 17.89                                                                      | 39.87                                        | 12.51                                                                      | 34.94        | 9.72                                                                       |
| 29.97                                   | 11.03                                                                      | 39.99        | 17.38                                                                      | 39.89                                        | 12.53                                                                      | 34.93        | 10.66                                                                      |
| 29.97                                   | 11.27                                                                      | 39.99        | 18.47                                                                      | 39.90                                        | 13.31                                                                      | 39.80        | 13.85                                                                      |
| 30.02                                   | 11.81                                                                      | 39.99        | 18.20                                                                      | 40.01                                        | 12.66                                                                      | 39.82        | 13.56                                                                      |
| 39.74                                   | 18.35                                                                      | 44.73        | 21.18                                                                      | 49.62                                        | 21.15                                                                      | 49.64        | 20.22                                                                      |
| 39.82                                   | 19.65                                                                      | 44.73        | 21.96                                                                      | 49.63                                        | 21.31                                                                      | 49.64        | 20.94                                                                      |
| 39.88                                   | 18.79                                                                      | 44.73        | 21.51                                                                      | 49.68                                        | 21.91                                                                      | 49.65        | 21.26                                                                      |
| 39.89                                   | 19.07                                                                      | 44.74        | 21.08                                                                      | 59.68                                        | 30.61                                                                      | 49.66        | 20.84                                                                      |
| 39.89                                   | 19.54                                                                      | 49.65        | 29.73                                                                      | 59.70                                        | 30.77                                                                      | 59.82        | 32.22                                                                      |
| 49.56                                   | 30.61                                                                      | 49.65        | 29.73                                                                      | 59.72                                        | 30.62                                                                      | 59.82        | 32.23                                                                      |
| 49.56                                   | 29.12                                                                      | 49.66        | 29.24                                                                      | 59.75                                        | 30.90                                                                      | 59.83        | 30.81                                                                      |
| 49.56                                   | 29.64                                                                      | 49.67        | 28.05                                                                      | 69.71                                        | 43.96                                                                      | 59.83        | 32.48                                                                      |
| 49.61                                   | 31.17                                                                      | 54.69        | 34.75                                                                      | 69.72                                        | 44.98                                                                      | 70.04        | 45.77                                                                      |
| 49.64                                   | 31.80                                                                      | 54.69        | 34.58                                                                      | 69.73                                        | 44.05                                                                      | 70.05        | 49.18                                                                      |
| 49.64                                   | 32.86                                                                      | 54.69        | 34.70                                                                      | 69.74                                        | 46.02                                                                      | 70.06        | 48.80                                                                      |
| 49.65                                   | 31.78                                                                      | 54.74        | 33.76                                                                      | 74.79                                        | 51.76                                                                      | 70.06        | 48.63                                                                      |
| 49.71                                   | 31.29                                                                      | 59.83        | 43.56                                                                      | 74.79                                        | 54.69                                                                      | 80.69        | 69.43                                                                      |
| 59.59                                   | 45.32                                                                      | 59.83        | 42.32                                                                      | 74.81                                        | 53.05                                                                      | 80.71        | 68.04                                                                      |
| 59.62                                   | 47.28                                                                      | 59.83        | 40.78                                                                      | 74.90                                        | 51.91                                                                      | 80.65        | 64.66                                                                      |
| 59.63                                   | 44.83                                                                      | 59.85        | 39.32                                                                      | 80.21                                        | 68.66                                                                      | 80.67        | 63.93                                                                      |
| 59.64                                   | 45.76                                                                      | 69.59        | 53.73                                                                      | 80.26                                        | 68.66                                                                      | 91.14        | 95.01                                                                      |
| 59.67                                   | 47.09                                                                      | 69.60        | 54.30                                                                      | 80.27                                        | 67.38                                                                      | 91.11        | 91.33                                                                      |
| 59.72                                   | 44.79                                                                      | 69.60        | 58.49                                                                      | 89.66                                        | 82.73                                                                      | 91.09        | 93.46                                                                      |
| 59.73                                   | 45.99                                                                      | 69.62        | 56.22                                                                      | 89.85                                        | 79.57                                                                      | 91.09        | 97.13                                                                      |
| 59.77                                   | 44.80                                                                      | 74.95        | 64.03                                                                      | 89.95                                        | 84.92                                                                      |              |                                                                            |
| 69.80                                   | 63.50                                                                      | 74.95        | 65.72                                                                      | 89.97                                        | 86.50                                                                      |              |                                                                            |
| 69.80                                   | 63.91                                                                      | 74.96        | 68.17                                                                      |                                              |                                                                            |              |                                                                            |
| 69.85                                   | 60.35                                                                      | 75.00        | 70.25                                                                      |                                              |                                                                            |              |                                                                            |
| 80.43                                   | 83.55                                                                      | 80.20        | 80.33                                                                      |                                              |                                                                            |              |                                                                            |
| 80.44                                   | 87.26                                                                      | 80.20        | 75.16                                                                      |                                              |                                                                            |              |                                                                            |
| 80.46                                   | 84.38                                                                      | 80.20        | 81.57                                                                      |                                              |                                                                            |              |                                                                            |
| 80.46                                   | 85.71                                                                      | 80.20        | 76.03                                                                      |                                              |                                                                            |              |                                                                            |
| 89.65                                   | 105.12                                                                     | 84.71        | 85.78                                                                      |                                              |                                                                            |              |                                                                            |
| 89.68                                   | 109.93                                                                     | 84.72        | 86.53                                                                      |                                              |                                                                            |              |                                                                            |

|       |        |       |        |  |  |  |  |
|-------|--------|-------|--------|--|--|--|--|
| 89.77 | 104.40 | 84.73 | 89.40  |  |  |  |  |
| 89.83 | 103.21 | 89.97 | 98.78  |  |  |  |  |
|       |        | 89.98 | 99.85  |  |  |  |  |
|       |        | 89.98 | 101.45 |  |  |  |  |
|       |        | 90.00 | 100.80 |  |  |  |  |

**Table S1 (continued).**

| [N <sub>1127</sub> ][Tf <sub>2</sub> N] |                                                                            |              |                                                                            | [N <sub>112,20201</sub> ][Tf <sub>2</sub> N] |                                                                            |              |                                                                            |
|-----------------------------------------|----------------------------------------------------------------------------|--------------|----------------------------------------------------------------------------|----------------------------------------------|----------------------------------------------------------------------------|--------------|----------------------------------------------------------------------------|
| <i>T</i> /°C                            | 10 <sup>12</sup><br><i>D</i> <sub>+</sub> /m <sup>2</sup> ·s <sup>-1</sup> | <i>T</i> /°C | 10 <sup>12</sup> <i>D</i> <sub>-</sub><br>/m <sup>2</sup> ·s <sup>-1</sup> | <i>T</i> /°C                                 | 10 <sup>12</sup><br><i>D</i> <sub>+</sub> /m <sup>2</sup> ·s <sup>-1</sup> | <i>T</i> /°C | 10 <sup>12</sup> <i>D</i> <sub>-</sub><br>/m <sup>2</sup> ·s <sup>-1</sup> |
| 39.91                                   | 13.74                                                                      | 39.98        | 13.15                                                                      | 10.06                                        | 7.97                                                                       | 24.96        | 14.86                                                                      |
| 39.92                                   | 12.93                                                                      | 39.98        | 14.81                                                                      | 10.07                                        | 7.83                                                                       | 24.99        | 16.90                                                                      |
| 39.93                                   | 12.89                                                                      | 39.99        | 13.90                                                                      | 10.11                                        | 8.71                                                                       | 25.04        | 16.78                                                                      |
| 44.66                                   | 17.06                                                                      | 40.00        | 13.91                                                                      | 10.11                                        | 8.52                                                                       | 29.91        | 20.85                                                                      |
| 44.66                                   | 17.07                                                                      | 49.88        | 20.73                                                                      | 15.07                                        | 11.37                                                                      | 29.87        | 21.67                                                                      |
| 44.66                                   | 16.03                                                                      | 49.88        | 20.22                                                                      |                                              |                                                                            | 29.86        | 18.98                                                                      |
| 49.61                                   | 21.57                                                                      | 49.89        | 21.57                                                                      | 15.24                                        | 11.05                                                                      | 39.84        | 32.25                                                                      |
| 49.99                                   | 20.97                                                                      | 49.89        | 20.98                                                                      | 15.25                                        | 11.17                                                                      | 39.81        | 32.37                                                                      |
| 50.00                                   | 22.11                                                                      | 59.72        | 29.52                                                                      | 19.92                                        | 14.03                                                                      | 39.82        | 33.02                                                                      |
| 50.02                                   | 21.15                                                                      | 69.80        | 43.29                                                                      | 19.92                                        | 13.74                                                                      | 39.82        | 33.28                                                                      |
| 50.02                                   | 21.68                                                                      | 69.80        | 43.76                                                                      | 19.93                                        | 14.58                                                                      | 49.61        | 45.84                                                                      |
| 59.66                                   | 33.10                                                                      | 69.81        | 43.67                                                                      | 19.93                                        | 13.59                                                                      | 49.63        | 44.25                                                                      |
| 59.68                                   | 30.54                                                                      | 69.81        | 45.31                                                                      | 19.93                                        | 15.14                                                                      | 49.63        | 47.24                                                                      |
| 59.68                                   | 31.69                                                                      | 79.65        | 61.97                                                                      | 24.93                                        | 18.87                                                                      | 49.64        | 45.26                                                                      |
| 59.72                                   | 33.58                                                                      | 79.66        | 65.51                                                                      | 24.96                                        | 19.11                                                                      | 59.85        | 59.67                                                                      |
| 69.69                                   | 46.68                                                                      | 79.66        | 62.99                                                                      | 24.98                                        | 17.47                                                                      | 59.83        | 65.74                                                                      |
| 69.71                                   | 45.16                                                                      | 79.70        | 61.91                                                                      | 25.00                                        | 19.17                                                                      | 59.83        | 60.62                                                                      |
| 69.72                                   | 44.52                                                                      | 84.64        | 70.95                                                                      | 25.00                                        | 17.54                                                                      | 59.83        | 58.83                                                                      |
| 69.78                                   | 44.78                                                                      | 84.67        | 70.95                                                                      | 25.01                                        | 17.27                                                                      | 69.84        | 84.91                                                                      |
| 74.84                                   | 51.76                                                                      | 84.68        | 71.96                                                                      | 29.86                                        | 21.62                                                                      | 69.80        | 81.89                                                                      |
| 79.74                                   | 63.27                                                                      | 84.68        | 73.87                                                                      | 29.86                                        | 22.44                                                                      | 69.80        | 79.73                                                                      |
| 79.75                                   | 63.65                                                                      | 89.91        | 89.94                                                                      | 29.87                                        | 23.05                                                                      | 69.80        | 78.30                                                                      |
| 79.82                                   | 60.90                                                                      | 89.92        | 84.10                                                                      | 29.88                                        | 22.64                                                                      | 80.69        | 104.79                                                                     |
| 79.90                                   | 63.98                                                                      | 89.92        | 86.21                                                                      | 39.81                                        | 33.87                                                                      | 80.68        | 112.03                                                                     |
| 90.03                                   | 80.03                                                                      | 89.93        | 79.90                                                                      | 39.82                                        | 33.76                                                                      | 80.69        | 113.35                                                                     |
| 90.03                                   | 83.64                                                                      |              |                                                                            | 39.83                                        | 34.37                                                                      | 80.68        | 107.18                                                                     |
| 90.07                                   | 83.40                                                                      |              |                                                                            | 39.84                                        | 36.32                                                                      | 91.22        | 135.10                                                                     |
| 90.10                                   | 84.84                                                                      |              |                                                                            | 49.85                                        | 49.96                                                                      | 91.09        | 136.82                                                                     |
|                                         |                                                                            |              |                                                                            | 49.89                                        | 48.72                                                                      | 91.30        | 136.98                                                                     |
|                                         |                                                                            |              |                                                                            | 49.89                                        | 50.47                                                                      | 91.04        | 145.75                                                                     |
|                                         |                                                                            |              |                                                                            | 49.90                                        | 51.13                                                                      |              |                                                                            |
|                                         |                                                                            |              |                                                                            | 59.80                                        | 65.27                                                                      |              |                                                                            |
|                                         |                                                                            |              |                                                                            | 59.81                                        | 67.19                                                                      |              |                                                                            |
|                                         |                                                                            |              |                                                                            | 59.83                                        | 70.17                                                                      |              |                                                                            |

|  |  |  |  |       |        |  |  |
|--|--|--|--|-------|--------|--|--|
|  |  |  |  | 59.85 | 66.81  |  |  |
|  |  |  |  | 69.58 | 90.68  |  |  |
|  |  |  |  | 69.66 | 92.57  |  |  |
|  |  |  |  | 69.67 | 91.58  |  |  |
|  |  |  |  | 69.67 | 90.83  |  |  |
|  |  |  |  | 79.64 | 118.95 |  |  |
|  |  |  |  | 79.80 | 115.82 |  |  |
|  |  |  |  | 79.81 | 117.13 |  |  |
|  |  |  |  | 79.82 | 116.80 |  |  |
|  |  |  |  | 89.84 | 149.94 |  |  |
|  |  |  |  | 89.95 | 150.06 |  |  |
|  |  |  |  | 89.95 | 147.87 |  |  |
|  |  |  |  | 89.99 | 152.49 |  |  |

**Table S2. Velocity cross-correlation and distinct diffusion coefficients and Nernst-Einstein deviation parameters.**

| [N <sub>1125</sub> ][Tf <sub>2</sub> N] |                                                                                                |                                                                                               |                                                                                               |                                                                                          |                                                                                          |                                                                                          |                      |
|-----------------------------------------|------------------------------------------------------------------------------------------------|-----------------------------------------------------------------------------------------------|-----------------------------------------------------------------------------------------------|------------------------------------------------------------------------------------------|------------------------------------------------------------------------------------------|------------------------------------------------------------------------------------------|----------------------|
| <i>T</i> /°C                            | 10 <sup>15</sup> <i>f</i> <sub>++</sub><br>/m <sup>5</sup> ·mol <sup>-1</sup> ·s <sup>-1</sup> | 10 <sup>15</sup> <i>f</i> <sub>-</sub><br>/m <sup>5</sup> ·mol <sup>-1</sup> ·s <sup>-1</sup> | 10 <sup>15</sup> <i>f</i> <sub>+-</sub><br>/m <sup>5</sup> mol <sup>-1</sup> ·s <sup>-1</sup> | 10 <sup>12</sup> <i>D</i> <sub>++</sub> <sup>d</sup><br>/m <sup>2</sup> ·s <sup>-1</sup> | 10 <sup>12</sup> <i>D</i> <sub>--</sub> <sup>d</sup><br>/m <sup>2</sup> ·s <sup>-1</sup> | 10 <sup>12</sup> <i>D</i> <sub>+-</sub> <sup>d</sup><br>/m <sup>2</sup> ·s <sup>-1</sup> | $\Delta$<br>(± 0.04) |
| 0                                       |                                                                                                |                                                                                               | -0.152                                                                                        |                                                                                          |                                                                                          | -0.973                                                                                   |                      |
| 5                                       |                                                                                                |                                                                                               | -0.226                                                                                        |                                                                                          |                                                                                          | -1.445                                                                                   |                      |
| 10                                      |                                                                                                |                                                                                               | -0.326                                                                                        |                                                                                          |                                                                                          | -2.078                                                                                   |                      |
| 15                                      |                                                                                                |                                                                                               | -0.456                                                                                        |                                                                                          |                                                                                          | -2.903                                                                                   |                      |
| 20                                      |                                                                                                |                                                                                               | -0.624                                                                                        |                                                                                          |                                                                                          | -3.954                                                                                   |                      |
| 25                                      |                                                                                                |                                                                                               | -0.833                                                                                        |                                                                                          |                                                                                          | -5.263                                                                                   |                      |
| 30                                      | -1.501                                                                                         |                                                                                               | -1.089                                                                                        | -10.74                                                                                   |                                                                                          | -6.861                                                                                   |                      |
| 40                                      | -2.911                                                                                         | -4.905                                                                                        | -1.764                                                                                        | -18.00                                                                                   | -30.71                                                                                   | -11.04                                                                                   | 0.353                |
| 50                                      | -4.851                                                                                         | -7.630                                                                                        | -2.686                                                                                        | -28.49                                                                                   | -47.46                                                                                   | -16.70                                                                                   | 0.373                |
| 60                                      | -7.298                                                                                         | -11.28                                                                                        | -3.888                                                                                        | -42.82                                                                                   | -69.74                                                                                   | -24.03                                                                                   | 0.384                |
| 70                                      | -10.18                                                                                         | -15.98                                                                                        | -5.403                                                                                        | -61.38                                                                                   | -98.10                                                                                   | -33.18                                                                                   | 0.389                |
| 80                                      | -13.42                                                                                         | -21.78                                                                                        | -7.258                                                                                        | -84.38                                                                                   | -132.97                                                                                  | -44.29                                                                                   | 0.390                |

| [N <sub>112,0co1</sub> ][Tf <sub>2</sub> N] |                                                                                                 |                                                                                               |                                                                                               |                                                                                          |                                                                                          |                                                                                          |                      |
|---------------------------------------------|-------------------------------------------------------------------------------------------------|-----------------------------------------------------------------------------------------------|-----------------------------------------------------------------------------------------------|------------------------------------------------------------------------------------------|------------------------------------------------------------------------------------------|------------------------------------------------------------------------------------------|----------------------|
| <i>T</i> /°C                                | 10 <sup>15</sup> <i>f</i> <sub>++</sub> /<br>m <sup>5</sup> ·mol <sup>-1</sup> ·s <sup>-1</sup> | 10 <sup>15</sup> <i>f</i> <sub>-</sub><br>/m <sup>5</sup> ·mol <sup>-1</sup> ·s <sup>-1</sup> | 10 <sup>15</sup> <i>f</i> <sub>+-</sub><br>/m <sup>5</sup> mol <sup>-1</sup> ·s <sup>-1</sup> | 10 <sup>12</sup> <i>D</i> <sub>++</sub> <sup>d</sup><br>/m <sup>2</sup> ·s <sup>-1</sup> | 10 <sup>12</sup> <i>D</i> <sub>--</sub> <sup>d</sup><br>/m <sup>2</sup> ·s <sup>-1</sup> | 10 <sup>12</sup> <i>D</i> <sub>+-</sub> <sup>d</sup><br>/m <sup>2</sup> ·s <sup>-1</sup> | $\Delta$<br>(± 0.04) |
| 0                                           |                                                                                                 |                                                                                               | -0.079                                                                                        |                                                                                          |                                                                                          | -0.533                                                                                   |                      |
| 5                                           |                                                                                                 |                                                                                               | -0.128                                                                                        |                                                                                          |                                                                                          | -0.860                                                                                   |                      |
| 10                                          |                                                                                                 |                                                                                               | -0.198                                                                                        |                                                                                          |                                                                                          | -1.325                                                                                   |                      |
| 15                                          |                                                                                                 |                                                                                               | -0.294                                                                                        |                                                                                          |                                                                                          | -1.963                                                                                   |                      |
| 20                                          |                                                                                                 |                                                                                               | -0.423                                                                                        |                                                                                          |                                                                                          | -2.814                                                                                   |                      |
| 25                                          |                                                                                                 |                                                                                               | -0.591                                                                                        |                                                                                          |                                                                                          | -3.915                                                                                   |                      |
| 30                                          |                                                                                                 |                                                                                               | -0.802                                                                                        |                                                                                          |                                                                                          | -5.296                                                                                   |                      |
| 35                                          |                                                                                                 | -2.64                                                                                         | -0.820                                                                                        |                                                                                          | -16.45                                                                                   | -6.980                                                                                   |                      |
| 40                                          | -1.56                                                                                           | -3.27                                                                                         | -1.375                                                                                        | -10.21                                                                                   | -21.43                                                                                   | -9.025                                                                                   | 0.259                |
| 50                                          | -2.56                                                                                           | -5.32                                                                                         | -2.187                                                                                        | -16.72                                                                                   | -34.72                                                                                   | -14.26                                                                                   | 0.271                |
| 60                                          | -4.04                                                                                           | -8.23                                                                                         | -3.267                                                                                        | -26.20                                                                                   | -53.30                                                                                   | -21.17                                                                                   | 0.289                |
| 70                                          | -6.07                                                                                           | -12.11                                                                                        | -4.652                                                                                        | -39.10                                                                                   | -77.99                                                                                   | -29.96                                                                                   | 0.306                |
| 80                                          | -8.75                                                                                           | -17.11                                                                                        | -6.353                                                                                        | -56.02                                                                                   | -109.5                                                                                   | -40.66                                                                                   | 0.324                |

**Table S2 (continued).**

| $[N_{1127}][Tf_2N]$ |                                                        |                                                       |                                                 |                                           |                                           |                                           |                            |
|---------------------|--------------------------------------------------------|-------------------------------------------------------|-------------------------------------------------|-------------------------------------------|-------------------------------------------|-------------------------------------------|----------------------------|
| $T/^\circ C$        | $10^{15} f_{++}/$<br>$m^5 \cdot mol^{-1} \cdot s^{-1}$ | $10^{15} f_{-}$<br>$/m^5 \cdot mol^{-1} \cdot s^{-1}$ | $10^{15} f_{+}$<br>$/m^5 mol^{-1} \cdot s^{-1}$ | $10^{12} D_{++}^d$<br>$/m^2 \cdot s^{-1}$ | $10^{12} D_{--}^d$<br>$/m^2 \cdot s^{-1}$ | $10^{12} D_{+-}^d$<br>$/m^2 \cdot s^{-1}$ | $\Delta$<br>( $\pm 0.04$ ) |
| 0                   |                                                        |                                                       | -0.107                                          |                                           |                                           | -0.623                                    |                            |
| 5                   |                                                        |                                                       | -0.161                                          |                                           |                                           | -0.933                                    |                            |
| 10                  |                                                        |                                                       | -0.236                                          |                                           |                                           | -1.358                                    |                            |
| 15                  |                                                        |                                                       | -0.334                                          |                                           |                                           | -1.918                                    |                            |
| 20                  |                                                        |                                                       | -0.462                                          |                                           |                                           | -2.646                                    |                            |
| 25                  |                                                        |                                                       | -0.625                                          |                                           |                                           | -3.567                                    |                            |
| 30                  |                                                        |                                                       | -0.828                                          |                                           |                                           | -4.710                                    |                            |
| 40                  | -2.70                                                  | -3.94                                                 | -1.378                                          | -15.28                                    | -22.26                                    | -7.786                                    | 0.400                      |
| 50                  | -4.31                                                  | -6.28                                                 | -2.149                                          | -24.18                                    | -35.27                                    | -12.07                                    | 0.408                      |
| 60                  | -6.51                                                  | -9.50                                                 | -3.182                                          | -36.30                                    | -52.97                                    | -17.75                                    | 0.417                      |
| 70                  | -9.39                                                  | -13.70                                                | -4.513                                          | -52.02                                    | -75.96                                    | -25.01                                    | 0.424                      |
| 80                  | -12.97                                                 | -18.99                                                | -6.188                                          | -71.43                                    | -104.6                                    | -34.08                                    | 0.427                      |

| $[N_{112,20201}][Tf_2N]$ |                                                        |                                                       |                                                 |                                           |                                           |                                           |                            |
|--------------------------|--------------------------------------------------------|-------------------------------------------------------|-------------------------------------------------|-------------------------------------------|-------------------------------------------|-------------------------------------------|----------------------------|
| $T/^\circ C$             | $10^{15} f_{++}/$<br>$m^5 \cdot mol^{-1} \cdot s^{-1}$ | $10^{15} f_{-}$<br>$/m^5 \cdot mol^{-1} \cdot s^{-1}$ | $10^{15} f_{+}$<br>$/m^5 mol^{-1} \cdot s^{-1}$ | $10^{12} D_{++}^d$<br>$/m^2 \cdot s^{-1}$ | $10^{12} D_{--}^d$<br>$/m^2 \cdot s^{-1}$ | $10^{12} D_{+-}^d$<br>$/m^2 \cdot s^{-1}$ | $\Delta$<br>( $\pm 0.04$ ) |
| 0                        |                                                        |                                                       | -0.410                                          |                                           |                                           | -2.542                                    |                            |
| 5                        |                                                        |                                                       | -0.578                                          |                                           |                                           | -3.569                                    |                            |
| 10                       | -1.43                                                  |                                                       | -0.790                                          | -8.79                                     |                                           | -4.865                                    |                            |
| 15                       | -1.90                                                  |                                                       | -1.051                                          | -11.64                                    |                                           | -6.451                                    |                            |
| 20                       | -2.48                                                  |                                                       | -1.368                                          | -15.16                                    |                                           | -8.366                                    |                            |
| 25                       | -3.19                                                  | -4.51                                                 | -1.747                                          | -19.43                                    | -27.50                                    | -10.65                                    | 0.363                      |
| 30                       | -4.04                                                  | -5.66                                                 | -2.192                                          | -24.55                                    | -34.40                                    | -13.32                                    | 0.365                      |
| 40                       | -6.26                                                  | -8.57                                                 | -3.285                                          | -37.75                                    | -51.74                                    | -19.83                                    | 0.373                      |
| 50                       | -9.20                                                  | -12.36                                                | -4.692                                          | -55.14                                    | -74.10                                    | -28.13                                    | 0.381                      |
| 60                       | -12.92                                                 | -17.08                                                | -6.439                                          | -76.97                                    | -101.7                                    | -38.36                                    | 0.387                      |
| 70                       | -17.52                                                 | -22.79                                                | -8.505                                          | -103.7                                    | -134.9                                    | -50.33                                    | 0.394                      |
| 80                       | -22.87                                                 | -29.44                                                | -10.98                                          | -134.5                                    | -173.1                                    | -64.55                                    | 0.396                      |
